# Supplementary material for: Seroepidemiology of SARS-CoV-2 Virus in Healthcare Workers before Circulation of the Omicron Sublineages BA.4/BA.5 in Vojvodina, Serbia
Source: MDPI journal article supplement (doi:10.3390/vaccines10122168), 2022-12-16
Supplement: s1 [file s1]

**Table S1.** Seropositivity of participants according to number of previous SARS-CoV-2 infection and/or number of COVID-19 vaccines received as measured by two serological tests.

| Variable                                                   | Anti-SARS-CoV-2 QuantiVac ELISA |              |        |              |       |          | LIAISON® SARS-CoV-2 TrimericS |              |        |              |       |          |
|------------------------------------------------------------|---------------------------------|--------------|--------|--------------|-------|----------|-------------------------------|--------------|--------|--------------|-------|----------|
|                                                            | No of samples                   | Seropositive |        | Seronegative |       | p value  | No of samples                 | Seropositive |        | Seronegative |       | p-value  |
|                                                            |                                 | n            | %      | n            | %     |          |                               | n            | %      | n            | %     |          |
| Without laboratory confirmation and unvaccinated           | 284                             | 178          | 62.68  | 106          | 37.32 | < 0.0001 | 235                           | 155          | 65.96  | 80           | 34.04 | < 0.0001 |
| Without laboratory confirmation and one dose of vaccine    | 12                              | 9            | 75.00  | 3            | 25.00 |          | 9                             | 9            | 100.00 | 0            | 0.00  |          |
| Without laboratory confirmation and two doses of vaccine   | 379                             | 337          | 88.92  | 42           | 11.08 |          | 272                           | 248          | 91.18  | 24           | 8.82  |          |
| Without laboratory confirmation and three doses of vaccine | 984                             | 953          | 96.85  | 31           | 3.15  |          | 844                           | 819          | 97.04  | 25           | 2.96  |          |
| Without laboratory confirmation and four doses of vaccine  | 6                               | 6            | 100.00 | 0            | 0.00  |          | 6                             | 6            | 100.00 | 0            | 0.00  |          |
| One laboratory confirmation and unvaccinated               | 387                             | 296          | 76.49  | 91           | 23.51 | < 0.0001 | 345                           | 294          | 85.22  | 51           | 14.78 | < 0.0001 |
| One laboratory confirmation and one dose of vaccine        | 19                              | 17           | 89.47  | 2            | 10.53 |          | 17                            | 17           | 100.00 | 0            | 0.00  |          |
| One laboratory confirmation and two doses of vaccine       | 587                             | 574          | 97.79  | 13           | 2.21  |          | 406                           | 401          | 98.77  | 5            | 1.23  |          |
| One laboratory confirmation and three doses of vaccine     | 799                             | 794          | 99.37  | 5            | 0.63  |          | 665                           | 662          | 99.55  | 3            | 0.45  |          |
| One laboratory confirmation and four doses of vaccine      | 2                               | 2            | 100.00 | 0            | 0.00  |          | 3                             | 3            | 100.00 | 0            | 0.00  |          |
| Two laboratory confirmation and unvaccinated               | 99                              | 96           | 96.97  | 3            | 3.03  | 0.4139   | 97                            | 95           | 97.94  | 2            | 2.06  | 0.3858   |
| Two laboratory confirmation and                            | 4                               | 4            | 100.00 | 0            | 0.00  |          | 6                             | 6            | 100.00 | 0            | 0.00  |          |

|                                                          |     |     |        |   |      |    |    |    |        |   |      |    |
|----------------------------------------------------------|-----|-----|--------|---|------|----|----|----|--------|---|------|----|
| one dose of vaccine                                      |     |     |        |   |      |    |    |    |        |   |      |    |
| Two laboratory confirmation and two doses of vaccine     | 140 | 138 | 98.57  | 2 | 1.43 |    | 98 | 98 | 100.00 | 0 | 0.00 |    |
| Two laboratory confirmation and three doses of vaccine   | 129 | 129 | 100.00 | 0 | 0.00 |    | 96 | 96 | 100.00 | 0 | 0.00 |    |
| Two laboratory confirmation and four doses of vaccine    | 0   | 0   | 0.00   | 0 | 0.00 |    | 0  | 0  | 0.00   | 0 | 0.00 |    |
| Three laboratory confirmation and unvaccinated           | 2   | 2   | 100.00 | 0 | 0.00 | NA | 2  | 2  | 100.00 | 0 | 0.00 | NA |
| Three laboratory confirmation and one dose of vaccine    | 0   | 0   | 0.00   | 0 | 0.00 |    | 0  | 0  | 0.00   | 0 | 0.00 |    |
| Three laboratory confirmation and two doses of vaccine   | 1   | 1   | 100.00 | 0 | 0.00 |    | 0  | 0  | 0.00   | 0 | 0.00 |    |
| Three laboratory confirmation and three doses of vaccine | 1   | 1   | 100.00 | 0 | 0.00 |    | 0  | 0  | 0.00   | 0 | 0.00 |    |
| Three laboratory confirmation and four doses of vaccine  | 0   | 0   | 0.00   | 0 | 0.00 |    | 0  | 0  | 0.00   | 0 | 0.00 |    |
